# Supplementary material
Source: publisher figshare collection journal article supplement (https://springernature.figshare.com/ndownloader/files/31091603)
Supplement: Supplementary file 1 [file 31091603]

## Sheet: README
Additional file 1 to Soininen et al Environmental Evidence -- Additional information on literature searches
Contains description of search sources including web addressed used, date and language of the search, and search string used in each source. Searches in different languages for the same source are indicated as separate rows.
Variable	Description
Website/search source	search source
Web address	web address of the search source, as published in the protocol for this systematic map
Final address for search (if different)	web site address for search, if different from the one published in the protocol for this systematic map
Date	date of search
Language	language of search
Search String	Search string used for the given source and language.
Comments on search	Full search refers to the use of full search string, modified search to situations where the search string had to be modified to match the search source.
Number of documents	For local/regional/specialist search sources (row 5 onwards) the number refers to documents considered potentially relevant based on title and abstract. For these sources, the full number of all documents/hits was not recorded consistently. Note that the sum of documents here is 423, but 112 of these were further filtered out before including to the main list of documents. This was mainly due to …

## Sheet: search sources
Website/search source	Web address	Final address for search (if different)	Date	Language	Search String	Comments on search	Number of documents
Web of Science Core Collection	webofknowledge.com	https://apps.webofknowledge.com/WOS_GeneralSearch_input.do?product=WOS&search_mode=GeneralSearch&SID=F5PZJ6aJqu6RVZ4D7iz&preferencesSaved=	2019-02-13	English	(arctic OR subarctic OR tundra) AND (herbivor* OR graz* OR browser OR browsing OR grubb* OR trampl* OR defolia* OR ((invertebrate OR insect) AND (gall* OR mining OR miner)))	Web of Science Core Collection, specifically: all years search within Topic (Science Citation Index Expanded (SCI-EXPANDED) – 1945-present, Social Sciences Citation Index (SSCI)—1956-present, Arts & Humanities Citation Index (A&HCI) - 1975-present, Emerging Sources Citation Index (ESCI) - 2015-present). Search conducted through the Norwegian University of Science and Technology (NTNU) University …	2190
Scopus	scopus.com	https://www.scopus.com/search/form.uri?display=basic#basic	2019-02-13	English	(arctic OR subarctic OR tundra) AND (herbivor* OR graz* OR browser OR browsing OR grubb* OR trampl* OR defolia* OR ((invertebrate OR insect) AND (gall* OR mining OR miner)))	Scopus (article title, abstract and keyword search) with no further limitations applied. Search conducted through the Norwegian University of Science and Technology (NTNU) University Library.	1914
Google Scholar	scholar.google.com		2019-03-19	English	(Arctic OR subarctic OR tundra) herbivore OR herbivory OR herbivorous OR browser OR browsing OR grubbing OR grubber OR trample OR trampled OR trampling OR trampler OR defoliate OR defoliated OR defoliating OR defoliation ; allintitle:(Arctic OR subarctic OR tundra) invertebrate gall ; allintitle:(Arctic OR subarctic OR tundra) invertebrate mining ; allintitle:(Arctic OR subarctic OR tundra) inver…	Modified searches conducted in Google Chrome browser with all history, cookies, and cache cleared.	220
Alaska Department of Fish and Game	http://www.adfg.alaska.gov		2018-11-20	English	(arctic OR subarctic OR tundra) AND (herbivore OR herbivory OR grazer OR grazing OR grazed OR graze OR browser OR browsing OR grubbing OR grubbed OR trample OR trampling OR trampled OR defoliate OR defoliating OR defoliation OR ((invertebrate OR insect) AND (gall OR mining OR miner))) ; (arctic OR subarctic OR tundra) AND ((invertebrate OR insect) AND (galls OR galling)	Modified search. No relevant results.	0
Alaska Department of Natural Resources	http://www.dnr.alaska.gov/		2019-02-01	English	(arctic OR subarctic OR tundra) AND (herbivore OR herbivory OR grazer OR grazing OR grazed OR graze OR browser OR browsing OR grubbing OR grubbed OR trample OR trampling OR trampled OR defoliate OR defoliating OR defoliation OR ((invertebrate OR insect) AND (gall OR mining OR miner))) ; (arctic OR subarctic OR tundra) AND ((invertebrate OR insect) AND (galls OR galling)	Modified search.	4
Arctic Biodiversity Data Centre	https://www.abds.is/	http://geo.abds.is/geonetwork/srv/eng/catalog.search#/search	2018-11-29	English	Chosen categories "terrestrial", “flora”, “fauna” and “ecosystem”	Full search did not work, instead we chose to use the categories "terrestrial", “flora”, “fauna” and “ecosystem”.	3
Arctic Centre (University of Lapland)	http://www.arcticcentre.org	https://lacris.ulapland.fi/fi/publications/search.html	2019-03-07	English	(arctic OR subarctic OR tundra) AND (herbivor* OR graz* OR browser OR browsing OR grubb* OR trampl* OR defolia* OR ((invertebrate OR insect) AND (gall* OR mining OR miner)))	Full search. No relevant results.	0
Arctic Centre (University of Lapland)	http://www.arcticcentre.org	https://lacris.ulapland.fi/fi/publications/search.html	2019-03-07	Finnish	(arkti* OR subarkti* OR *tundra) AND (herbivor* OR kasvinsyöj* OR laidun* OR tall* polk* OR ((selkärangat* OR hyöntei*) AND (äkäm* OR syömäkuvio* OR *tuho))), plus single word searches	Full search. No relevant results.	0
Arctic Council	http://www.arctic-council.org	https://oaarchive.arctic-council.org/discover	2018-09-12	English	(arctic OR subarctic OR tundra) AND (herbivor* OR graz* OR browser OR browsing OR grubb* OR trampl* OR defolia* OR ((invertebrate OR insect) AND (gall* OR mining OR miner)))	Full search in final web address, single word search in main page search field.	11
Arctic Institute of North America	https://arctic.ucalgary.ca/databases	http://www.aina.ucalgary.ca/astis/	2018-12-20	English	Modified search: (wo arctic or wo subarctic or wo tundra) and (wo herbivor* or wo graz* or wo brows* or wo grubb* or wo trampl* or wo defolia*); (wo arctic or wo subarctic or wo tundra) and ((wo invertebrate OR wo insect) and (wo gall* or wo mining or wo miner)); Main page search field: (arctic OR subarctic OR tundra) in combination with each of the other words, without *.	Modified search in final web address and main page search field. Search results were not recorded per language, number of documents per language here refers to the number of documents written in each language.	85
Arctic Institute of North America	https://arctic.ucalgary.ca/databases	http://www.aina.ucalgary.ca/astis/	2019-09-20	French	(arctique OR subarctique OR toundra) AND (herbivore OR pâtur* OR paître OR brout* OR fouill* OR pietin* OR defoli* OR ((invertébré OR insecte) AND (galle* OR mineu*)))	Full search in final web address and main page search field. Search results were not recorded per language, number of documents per language here refers to the number of documents written in each language.	6
Arctic Portal	http://library.arcticportal.org/		2018-11-28	English	(arctic OR subarctic OR tundra) AND (herbivor* OR graz* OR browser OR browsing OR grubb* OR trampl* OR defolia* OR ((invertebrate OR insect) AND (gall* OR mining OR miner)))	Full search.	14
Bureau of Land Management, US Dept. of the Interior	http://www.blm.gov		2018-11-20	English	(arctic OR subarctic OR tundra) AND (herbivor* OR graz* OR browser OR browsing OR grubb* OR trampl* OR defolia* OR ((invertebrate OR insect) AND (gall* OR mining OR miner)))	Full search. No relevant results.	0
Current Research Information System in Norway	http://www.cristin.no	https://app.cristin.no/	2018-11-15	English	(arctic OR subarctic OR tundra) AND (herbivor* OR graz* OR browser OR browsing OR grubb* OR trampl* OR defolia* OR ((invertebrate OR insect) AND (gall* OR mining OR miner)))	Full search (both in final web address and main page search field). Search results were not recorded per language, number of documents per language here refers to the number of documents written in each language.	59
Current Research Information System in Norway	http://www.cristin.no	https://app.cristin.no/	2018-11-15	Norwegian	(arktisk OR subarktisk OR tundra) AND (herbivor* OR planteete* OR plantespise* OR beit* OR gressing OR tramp* OR defolie* OR ((invertebrat* OR insekt) AND (gall* OR miner*)))	Full search in Norwegian (both in final web address and main page search field). Search results were not recorded per language, number of documents per language here refers to the number of documents written in each language.	0
Doria (National Library of Finland)	http://www.doria.fi		2019-03-17	English	Single word searches in English through the website's own filtering system.	The web site’s own filtering system was used instead of full search string. No relevant results.	0
Doria (National Library of Finland)	http://www.doria.fi		2019-03-17	Finnish	Single word searches in Finnish through the website's own filtering system.	The web site’s own filtering system was used instead of full search string. No relevant results.	0
disserCat (Russian Electronic Scientific Catalogue of Dissertations)	http://www.dissercat.com/		2019-06-16	Russian	Searches of: аркти*; субаркти*; тундр*; тундр, выпас; тундр, перевыпас; тундр, травоядные; тундр, дефолиа; тундр, дефолиация; тундр, ощип or тундр, ощипывание; тундр, галлообраз; тундр, галлообразование; тундр, вытаптывание; тундр, паст; тундр, пастбищ; тундр, выб; тундр, выбивание	Modified search in Russian. A search in English was not relevant for this page.	6
Environment Canada	http://www.ec.gc.ca	https://science-libraries.canada.ca/eng/environment/; https://fsl-bsf.summon.serialssolutions.com/en/	2019-09-20	French	(arctique OR subarctique OR toundra) AND (herbivore OR pâtur* OR paître OR brout* OR fouill* OR pietin* OR defoli* OR ((invertébré OR insecte) AND (galle* OR mineu*)))	Full search. Results filtered by discipline (including zoology, ecology, biology, botany, environmental sciences, and sciences).	0
Environment Canada	http://www.ec.gc.ca	https://science-libraries.canada.ca/eng/environment/; https://fsl-bsf.summon.serialssolutions.com/en/	2020-03-31	English	full search (English), filtered by discipline (including zoology, ecology, biology, botany, environmental sciences, and sciences), filtered by discipline (including zoology, ecology, biology, botany, environmental sciences, and sciences)	Full search. Results filtered by discipline (including zoology, ecology, biology, botany, environmental sciences, and sciences).	2
European Commission Joint Research Centre	https://ec.europa.eu/jrc/en	https://ec.europa.eu/jrc/en/publications-list	2018-11-26	English	(arctic OR subarctic OR tundra) AND (herbivor* OR graz* OR browser OR browsing OR grubb* OR trampl* OR defolia* ; (arctic OR subarctic OR tundra) AND invertebrate; (arctic OR subarctic OR tundra) AND insect	Modified search (in final web address and main page search field). No relevant results.	0
European Environment Agency	https://www.eea.europa.eu/	https://www.eea.europa.eu/data-and-maps/find/global#c0=12&c6=&c1=Article&c1=Data&c1=Graph&c1=Indicator&c1=Infographic&c1=Interactive+data&c1=Interactive+map&c1=Map&c1=News&c1=Publication&c1=Video&b_start=0	2018-12-13	English	(arctic OR subarctic OR tundra) AND (herbivor* OR graz* OR browser OR browsing OR grubb* OR trampl* OR defolia* OR ((invertebrate OR insect) AND (gall* OR mining OR miner)))	Full search (both in final web address (all content types), and in main page search field)	5
Finland’s Environmental Administration	http://www.environment.fi/	https://www.environment.fi/en-US/search	2019-02-28	English	(arctic OR subarctic OR tundra) AND (herbivor* OR graz* OR browser OR browsing OR grubb* OR trampl* OR defolia* OR ((invertebrate OR insect) AND (gall* OR mining OR miner))) plus single word searches	Full search + single words. No relevant results.	0
Finland’s Environmental Administration	http://www.environment.fi/	https://www.environment.fi/en-US/search	2019-02-28	Finnish	(arkti* OR subarkti* OR *tundra) AND (herbivor* OR kasvinsyöj* OR laidun* OR tall* polk* OR ((selkärangat* OR hyöntei*) AND (äkäm* OR syömäkuvio* OR *tuho))), plus single word searches	Full search + single words. No relevant results.	0
Food and Agriculture Organization of the United Nations	http://www.fao.org	http://www.fao.org/publications/en/ ; http://www.fao.org/documents/search/en/ ; http://www.fao.org/faostat/en/#home	2018-12-20	English	(arctic OR subarctic OR tundra) AND (herbivor* OR graz* OR browser OR browsing OR grubb* OR trampl* OR defolia* OR ((invertebrate OR insect) AND (gall* OR mining OR miner))) in the first two final web addresses, plus single word search in the third web address	Full search in the two first final web addresses, single search words in the last.	0
Greenland Ecosystem Monitoring	http://www.g-e-m.dk		2018-03-12	English	(arctic OR subarctic OR tundra) AND (herbivor* OR graz* OR browser OR browsing OR grubb* OR trampl* OR defolia* OR ((invertebrate OR insect) AND (gall* OR mining OR miner)))	Full search. Search results were not recorded per language. 27 documents for the Engilsh search refers to the combined results. All retrieved documents were written in English.	27
Greenland Ecosystem Monitoring	http://www.g-e-m.dk		2018-03-12	Danish	(arktisk OR subarktisk OR tundra) AND (herbivor* OR planteæde* OR plantespise* OR græs* OR tramp* OR defolie* OR ((invertebrat* OR insekt) AND (gal* OR miner*)))	Full search. Search results were not recorded per language. 27 documents for the Engilsh search refers to the combined results. All retrieved documents were written in English.	0
Greenland Institute of Natural Resources	http://www.natur.gl	http://www.natur.gl/en/environment-and-mineral-resources/publications-and-communication/ ; http://www.natur.gl/en/birds-and-mammals/publications-and-communication/	2018-06-12	English	(arctic OR subarctic OR tundra) AND (herbivor* OR graz* OR browser OR browsing OR grubb* OR trampl* OR defolia* OR ((invertebrate OR insect) AND (gall* OR mining OR miner))) plus single word search in main page	Full search in final web addresses, and single search words in main page search field. Search results were not recorded per language, number of documents per language here refers to the number of documents written in each language.	2
Greenland Institute of Natural Resources	http://www.natur.gl	http://www.natur.gl/en/environment-and-mineral-resources/publications-and-communication/ ; http://www.natur.gl/en/birds-and-mammals/publications-and-communication/	2018-06-12	Danish	(arktisk OR subarktisk OR tundra) AND (herbivor* OR planteæde* OR plantespise* OR græs* OR tramp* OR defolie* OR ((invertebrat* OR insekt) AND (gal* OR miner*))), plus single word searches in the main page search field	Full search in final web addresses, and single search words in main page search field. Search results were not recorded per language, number of documents per language here refers to the number of documents written in each language.	3
GRID Arendal	http://www.grida.no		2018-11-26	English	Arctic/subarctic/tundra (one at the time) AND each of the other search words (one at the time)	Modified search in English and Norwegian. Search results were not recorded per language, number of documents per language here refers to the number of documents written in each language.	2
GRID Arendal	http://www.grida.no		2018-11-26	Norwegian	Arktisk/subarktisk/tundra (one at the time) AND each of the other search words (one at the time)	Modified search in English and Norwegian. Search results were not recorded per language, number of documents per language here refers to the number of documents written in each language.	0
International Union for Conservation of Nature	http://www.iucn.org	https://portals.iucn.org/library/dir/publications-list	2018-11-26	English	(arctic OR subarctic OR tundra) AND each of the other search words (one at the time)	Modified search in final web address, and main page search field.	1
Landbunadur (Icelandic Repository for Agricultural Sciences)	http://landbunadur.is		2019-12-04	English	(arctic OR subarctic OR tundra) AND (herbivor* OR graz* OR browser OR browsing OR grubb* OR trampl* OR defolia* OR ((invertebrate OR insect) AND (gall* OR mining OR miner)))	Full search.	4
Landbunadur (Icelandic Repository for Agricultural Sciences)	http://landbunadur.is		2019-12-04	Icelandic	(arktísk* OR subarktísk* OR norðurslóð* OR túndr* OR freðmýr*) AND (grasæt* OR beit* OR beitardýr OR bíta OR lirfa* OR traðk* OR aflaufgun* OR ((hryggleysing* OR skordýr*) AND (kýli* OR bora)))	Full search.	0
Ministry of Natural Resources of the Russian Federation	http://www.mnr.gov.ru		2019-06-14	Russian	single word searches	Single search words used. No relevant results.	0
Ministry of Natural Resources of the Russian Federation	http://www.mnr.gov.ru		2019-11-13	English	single word searches	Single search words used. No relevant results.	0
Natural Resources Canada	http://www.nrcan.gc.ca		2018-11-29	English	Arctic/subarctic/tundra (one at the time) AND each of the other search words (one at the time)	Modified search.	5
Natural Resources Canada	http://www.nrcan.gc.ca		2019-09-20	French	Arctique/subarctique/toundra (one at the time) AND each of the other search words (one at the time)	Modified search.	0
Natural Resources Institute Finland	http://www.luke.fi	http://jukuri.luke.fi/	2019-03-01	English	(arctic OR subarctic OR tundra) AND (herbivor* OR graz* OR browser OR browsing OR grubb* OR trampl* OR defolia* OR ((invertebrate OR insect) AND (gall* OR mining OR miner))) plus single word searches	Full search in relevant sections (Kirjat ja raportit, Luonnonvarakeskuksen julkaisut, Metlan julkaisusarjat, MTT:n julkaisusarjat, RKTL:n julkaisusarjat, and Tiken julkaisut), in addition to a separate search in the journal «Annales Agriculturae Fenniae». Search results were not recorded per language, number of documents per language here refers to the number of documents written in each language.	13
Natural Resources Institute Finland	http://www.luke.fi	http://jukuri.luke.fi/	2019-03-01	Finnish	(arkti* OR subarkti* OR *tundra) AND (herbivor* OR kasvinsyöj* OR laidun* OR tall* polk* OR ((selkärangat* OR hyöntei*) AND (äkäm* OR syömäkuvio* OR *tuho))), plus single word searches	Full search in relevant sections (Kirjat ja raportit, Luonnonvarakeskuksen julkaisut, Metlan julkaisusarjat, MTT:n julkaisusarjat, RKTL:n julkaisusarjat, and Tiken julkaisut), in addition to a separate search in the journal «Annales Agriculturae Fenniae». Search results were not recorded per language, number of documents per language here refers to the number of documents written in each language.	2
Nordic Council of Ministers	http://www.norden.org		2018-11-15	English	Arctic/subarctic/tundra (one at the time) AND each of the other search words (one at the time)	Modified search. Only arctic gave results and were combined with the other words.	0
Northern Research Institute (NORUT)	http://www.norut.no		2018-11-20	English	Arctic/subarctic/tundra (one at the time). Arctic AND each of the other words (one at the time).	Modified search in both languages. Only arctic gave results and were combined with the other words. Search results were not recorded per language, number of documents per language here refers to the number of documents written in each language.	3
Northern Research Institute (NORUT)	http://www.norut.no		2018-11-20	Norwegian	Arktisk/subarktisk/tundra (one at the time). Arctic AND each of the other words (one at the time).	Modified search in both languages. Only arctic gave results and were combined with the other words. Search results were not recorded per language, number of documents per language here refers to the number of documents written in each language.	0
Norwegian Agriculture Agency	http://www.landbruksdirektoratet.no		2018-11-19	English	Arctic/subarctic/tundra (one at the time). Arctic AND each of the other words (one at the time).	Modified search in both languages. Only arctic gave results and were combined with the other words.	0
Norwegian Agriculture Agency	http://www.landbruksdirektoratet.no		2018-11-19	Norwegian	Arktisk/subarktisk/tundra (one at the time). Arctic AND each of the other words (one at the time).	Modified search in both languages. Only arctic gave results and were combined with the other words.	0
Norwegian Environment Agency	http://www.miljødirektoratet.no		2018-11-19	English	Arctic/subarctic/tundra (one at the time) AND each of the other search words (* replaced with alternative endings); only looked at first 100 results	Modified search. Only possible to look at the first 100 results. Search results were not recorded per language, number of documents per language here refers to the number of documents written in each language.	0
Norwegian Environment Agency	http://www.miljødirektoratet.no		2018-11-19	Norwegian	Arktisk/subarktisk/tundra (one at the time) AND each of the other search words (* replaced with alternative endings); only looked at first 100 results	Modified search. Only possible to look at the first 100 results. Search results were not recorded per language, number of documents per language here refers to the number of documents written in each language.	9
Norwegian Institute of Bioeconomy Research	http://www.nibio.no		2018-03-12	English	Arctic/subarctic/tundra (one at the time) AND each of the other search words.	Modified search. Search results were not recorded per language, number of documents per language here refers to the number of documents written in each language.	6
Norwegian Institute of Bioeconomy Research	http://www.nibio.no		2018-03-12	Norwegian	Arktisk/subarktisk/tundra (one at the time) AND each of the other search words.	Modified search. Search results were not recorded per language, number of documents per language here refers to the number of documents written in each language.	2
Norwegian Institute for Nature Research	http://www.nina.no	https://www.nina.no/Publikasjoner/S%C3%B8k-etter-publikasjoner	2018-04-12	English	in final web address: (arctic OR subarctic OR tundra) AND (herbivor* OR graz* OR browser OR browsing OR grubb* OR trampl* OR defolia*); (arctic OR subarctic OR tundra) AND (invertebrate OR insect); (arctic OR subarctic OR tundra) in combination with each of the words gall*/miner/mining; full search (English) in main search page, where only looked at first 100 results	Modified search in final web address, and full search in main page search field (in the latter, only 100 results could be shown). In both languages.Search results were not recorded per language, number of documents per language here refers to the number of documents written in each language.	6
Norwegian Institute for Nature Research	http://www.nina.no	https://www.nina.no/Publikasjoner/S%C3%B8k-etter-publikasjoner	2018-04-12	Norwegian	in final web address: (arktisk OR subarktisk OR tundra) AND (herbivor* OR planteete* OR plantespise* OR beite OR gressing* OR tramp* OR defolie*); (arktisk OR subarktisk OR tundra) AND (invertebrat* OR insekt); (arktisk OR subarktisk OR tundra) in combination with each of the words gall*/miner; in main search page: (arktisk OR subarktisk OR tundra) AND (herbivor* OR planteete* OR plantespise* OR …	Modified search in final web address, and full search in main page search field (in the latter, only 100 results could be shown). In both languages. Search results were not recorded per language, number of documents per language here refers to the number of documents written in each language.	1
NORA (Norwegian Open Access Publication Archive)	https://nora.openaccess.no/		2018-06-11	English	(arctic OR subarctic OR tundra) AND (herbivor* OR graz* OR browser OR browsing OR grubb* OR trampl* OR defolia* OR ((invertebrate OR insect) AND (gall* OR mining OR miner)))	Full search. Search results were not recorded per language, number of documents per language here refers to the number of documents written in each language.	4
NORA (Norwegian Open Access Publication Archive)	https://nora.openaccess.no/		2018-06-11	Norwegian	(arktisk OR subarktisk OR tundra) AND (herbivor* OR planteete* OR plantespise* OR beit* OR gressing OR tramp* OR defolie* OR ((invertebrat* OR insekt) AND (gall* OR miner*)))	Full search. Search results were not recorded per language, number of documents per language here refers to the number of documents written in each language.	0
Norwegian Polar Institute	http://www.npolar.no	http://www.npolar.no/no/publikasjoner/ ; https://data.npolar.no/home/ ; https://brage.npolar.no/npolar-xmlui/handle/11250/92941	2018-12-18	English	Main page search field and second and third final web addresses: Arctic/subarctic/tundra (one at the time) AND each of the other search words (* replaced with alternative endings); full search (English) in first final web address	Modified search in main page search field and Brage. Full search in the first web address. Modified search in the two last addresses. In both languages. Search results were not recorded per language, number of documents per language here refers to the number of documents written in each language.	44
Norwegian Polar Institute	http://www.npolar.no	http://www.npolar.no/no/publikasjoner/ ; https://data.npolar.no/home/ ; https://brage.npolar.no/npolar-xmlui/handle/11250/92941	2018-12-18	Norwegian	Main page search field and second and third final web addresses: Arktisk/subarktisk/tundra (one at the time) AND each of the other search words (* replaced with alternative endings); first final web address search (arktisk OR subarktisk OR tundra) AND (herbivor* OR planteete* OR plantespise* OR beit* OR gressing OR tramp* OR defolie* OR ((invertebrat* OR insekt) AND (gall* OR miner*)))	Modified search in main page search field and Brage. Full search in the first web address. Modified search in the two last addresses. In both languages. Search results were not recorded per language, number of documents per language here refers to the number of documents written in each language.	12
Russian Science Citation Index	https://elibrary.ru/		2019-06-21	English	(arctic OR subarctic OR tundra); searched among the results with (herbivor* OR graz* OR browser OR browsing OR grubb* OR trampl* OR defolia*) or (gall* OR mining OR miner) or (invertebrate OR insect) separately	Modified search. Search results were not recorded per language, number of documents per language here refers to the number of documents written in each language.	6
Russian Science Citation Index	https://elibrary.ru/		2019-06-21	Russian	Multiple searches: аркти* OR тундр* OR субаркти*; that with травоядные or with выпас	Modified search. Search results were not recorded per language, number of documents per language here refers to the number of documents written in each language.	43
Russian Regional Environmental Centre	http://www.rusrec.ru		2019-06-14	Russian	(травояд* OR дефолиа* OR ощип* OR галлообраз* OR топт* OR выпас OR перевыпас OR паст* OR выби*) AND (аркти* OR тундр* OR субаркти*)	Full search, no relevant results.	0
Russian Regional Environmental Centre	http://www.rusrec.ru		2019-11-13	English	(arctic OR subarctic OR tundra) AND (herbivor* OR graz* OR browser OR browsing OR grubb* OR trampl* OR defolia* OR ((invertebrate OR insect) AND (gall* OR mining OR miner)))	Full search, no relevant results.	0
Royal Danish Library’s publication portal	https://tidsskrift.dk/		2018-12-20	English	Arctic AND each of the other words (* replaced with alternative endings); Subarctic/tundra searched separately	Modified search in both languages. Search results were not recorded per language, number of documents per language here refers to the number of documents written in each language.	2
Royal Danish Library’s publication portal	https://tidsskrift.dk/		2018-12-20	Danish	arktisk AND each of the other words (* replaced with alternative endings); subarktisk/tundra searched separately	Modified search in both languages. Search results were not recorded per language, number of documents per language here refers to the number of documents written in each language.	0
Skemman (Icelandic Academic Repository)	https://skemman.is/?locale=en		2018-06-11	English	(arctic OR subarctic OR tundra) AND (herbivor* OR graz* OR browser OR browsing OR grubb* OR trampl* OR defolia* OR ((invertebrate OR insect) AND (gall* OR mining OR miner)))	Full search. Search results were not recorded per language, number of documents per language here refers to the number of documents written in each language.	4
Skemman (Icelandic Academic Repository)	https://skemman.is/?locale=en		2019-14-12	Icelandic	(arktísk* OR subarktísk* OR norðurslóð* OR túndr* OR freðmýr*) AND (grasæt* OR beit* OR beitardýr OR bíta OR lirfa* OR traðk* OR aflaufgun* OR ((hryggleysing* OR skordýr*) AND (kýli* OR bora)))	Full search. Search results were not recorded per language, number of documents per language here refers to the number of documents written in each language.	0
Swedish Environmental Protection Agency	http://www.naturvardsverket.se		2018-11-19	English	(arctic OR subarctic OR tundra) AND (herbivor* OR graz* OR browser OR browsing OR grubb* OR trampl* OR defolia* OR ((invertebrate OR insect) AND (gall* OR mining OR miner)))	Full search. Search results were not recorded per language, number of documents per language here refers to the number of documents written in each language.	1
Swedish Environmental Protection Agency	http://www.naturvardsverket.se		2018-11-19	Swedish	(arktisk OR subarktisk OR tundra) AND (herbivor* OR bet* OR tramp* OR defolie* OR ((invertebrat* OR insekt) AND (gall* OR borr*)))	Full search. Search results were not recorded per language, number of documents per language here refers to the number of documents written in each language.	7
United Nations Environment Programme	http://www.unep.org		2018-07-12	English	Arctic/subarctic/tundra (one at the time) AND each of the other search words (* replaced with alternative endings.	Modified search. No relevant results.	0
United States Environmental Protection Agency	http://www.epa.gov	https://nepis.epa.gov/Exe/ZyNET.EXE?ZyActionL=Register&User=anonymous&Password=anonymous&Client=EPA&Init=1	2018-12-20	English	(arctic OR subarctic OR tundra) AND (herbivor* OR graz* OR browser OR browsing OR grubb* OR trampl* OR defolia* OR ((invertebrate OR insect) AND (gall* OR mining OR miner)))	Full search in main page search field and final web address.	9
United States Fish and Wildlife Service	http://www.fws.gov		2018-07-12	English	(arctic OR subarctic OR tundra) AND (herbivor* OR graz* OR browser OR browsing OR grubb* OR trampl* OR defolia* OR ((invertebrate OR insect) AND (gall* OR mining OR miner)))	Full search.	4
University of Alaska Anchorage	http://www.uaa.alaska.edu		2018-11-20	English	(arctic OR subarctic OR tundra) AND (herbivor* OR graz* OR browser OR browsing OR grubb* OR trampl* OR defolia* OR ((invertebrate OR insect) AND (gall* OR mining OR miner)))	Modified search (removed *).	6
